# Supplementary material
Source: ML conference proceedings conference paper supplement (https://proceedings.neurips.cc/paper_files/paper/2024/hash/370df50ccfdf8bde18f8f9c2d9151bda-Abstract.html)
Supplement: Supplementary file 1 [file 370df50ccfdf8bde18f8f9c2d9151bda-Supplemental-Datasets_and_Benchmarks_Track.pdf]

## A FineWeb Datasheet

| Dataset Details        |                                                                                                                                                                                                                                                                                                                                                                                                                                                                                                                                                                                                                                                                                                                                                                                                                                                                                                                                                                                                                                                                                          |
|------------------------|------------------------------------------------------------------------------------------------------------------------------------------------------------------------------------------------------------------------------------------------------------------------------------------------------------------------------------------------------------------------------------------------------------------------------------------------------------------------------------------------------------------------------------------------------------------------------------------------------------------------------------------------------------------------------------------------------------------------------------------------------------------------------------------------------------------------------------------------------------------------------------------------------------------------------------------------------------------------------------------------------------------------------------------------------------------------------------------|
| Purpose of the dataset | We released FineWeb to make large language model training more accessible to the machine learning community at large.                                                                                                                                                                                                                                                                                                                                                                                                                                                                                                                                                                                                                                                                                                                                                                                                                                                                                                                                                                    |
| Curated by             | The dataset was curated by Hugging Face.                                                                                                                                                                                                                                                                                                                                                                                                                                                                                                                                                                                                                                                                                                                                                                                                                                                                                                                                                                                                                                                 |
| Funded by              | The dataset was funded by Hugging Face.                                                                                                                                                                                                                                                                                                                                                                                                                                                                                                                                                                                                                                                                                                                                                                                                                                                                                                                                                                                                                                                  |
| Language(s)            | English                                                                                                                                                                                                                                                                                                                                                                                                                                                                                                                                                                                                                                                                                                                                                                                                                                                                                                                                                                                                                                                                                  |
| License                | The dataset is released under the Open Data Commons Attribution License (ODC-By) v1.0 license. The use of this dataset is also subject to Common-Crawl's Terms of Use.                                                                                                                                                                                                                                                                                                                                                                                                                                                                                                                                                                                                                                                                                                                                                                                                                                                                                                                   |
| Dataset Structure      |                                                                                                                                                                                                                                                                                                                                                                                                                                                                                                                                                                                                                                                                                                                                                                                                                                                                                                                                                                                                                                                                                          |
| Data Instances         | <p>The following is an example sample from the dataset. It is part of the CC-MAIN-2021-43 snapshot and was crawled on 2021-10-15T21:20:12Z:</p> <pre>{   "text": "This is basically a   ↪ peanut flavoured cream   ↪ thickened with egg yolks and   ↪ then set into a ramekin on top   ↪ of some jam. Tony, one of the   ↪ Wedgwood chefs, suggested   ↪ sprinkling on some toasted   ↪ crushed peanuts at the end to   ↪ create extra crunch, which I   ↪ thought was a great idea. The   ↪ result is excellent.",   "id":   ↪ "&lt;urn:uuid:e5a3e79a-13d4-4147-   ↪ a26e-167536fcac5d&gt;",   "dump": "CC-MAIN-2021-43",   "url": "&lt;http://allrecipes.co.uk   ↪ /recipe/24758/peanut-butter-and   ↪ -jam-creme-brulee.aspx   ↪ ?o_is=SimilarRecipes&amp;o_ln=Sim   ↪ Recipes_Photo_7&gt;",   "date": "2021-10-15T21:20:12Z",   "file_path":   ↪ "s3://commoncrawl/crawl-data/   ↪ CC-MAIN-2021-43/segments/   ↪ 1634323583083.92/warc/   ↪ CC-MAIN-20211015192439   ↪ -20211015222439-00600.warc.gz",   "language": "en",   "language_score": 0.948729,   "token_count": 69 }</pre> |

|                                    |                                                                                                                                                                                                                                                                                                                                                                                                                                                                                                                                                                                                                                                                                                                                                                                                  |
|------------------------------------|--------------------------------------------------------------------------------------------------------------------------------------------------------------------------------------------------------------------------------------------------------------------------------------------------------------------------------------------------------------------------------------------------------------------------------------------------------------------------------------------------------------------------------------------------------------------------------------------------------------------------------------------------------------------------------------------------------------------------------------------------------------------------------------------------|
| Data Fields                        | <ul style="list-style-type: none"> <li>- text (string): the main text content</li> <li>- id (string): original unique identifier for this sample from CommonCrawl</li> <li>- dump (string): the CommonCrawl dump/snapshot this sample was a part of</li> <li>- url (string): url to the original page where text was present</li> <li>- date (string): crawl date (from CommonCrawl)</li> <li>- file_path (string): s3 path for the individual CommonCrawl warc file containing this sample</li> <li>- language (string): en for all the samples in this dataset</li> <li>- language_score (float): language prediction score (0.01.0) as reported by the fastText language classifier</li> <li>- token_count (int): number of tokens when applying the gpt2 tokenizer to this sample</li> </ul> |
| Data Splits                        | The default subset includes the entire dataset. We also include separate splits for each CommonCrawl dump. FineWeb-Edu, a subset filtered for educational content, is also available.                                                                                                                                                                                                                                                                                                                                                                                                                                                                                                                                                                                                            |
| <b>Dataset Creation</b>            |                                                                                                                                                                                                                                                                                                                                                                                                                                                                                                                                                                                                                                                                                                                                                                                                  |
| Curation Rationale                 | With FineWeb, we aim to provide the open source community with a clean and large-scale dataset for pretraining performant large language models.                                                                                                                                                                                                                                                                                                                                                                                                                                                                                                                                                                                                                                                 |
| Source Data                        | The source data consists of webpages crawled by the CommonCrawl foundation over the 2013-2024 time period. We then extracted the main page text from the HTML of each webpage, filtered each sample and deduplicated each individual CommonCrawl dump/crawl.                                                                                                                                                                                                                                                                                                                                                                                                                                                                                                                                     |
| Data processing steps              | <p>The data processing pipeline consists of:</p> <ul style="list-style-type: none"> <li>- URL filtering</li> <li>- Trafilatura text extraction</li> <li>- FastText language filter</li> <li>- MassiveText repetition and quality ↪ filters</li> <li>- C4 quality filters</li> <li>- FineWeb custom filters</li> <li>- MinHash deduplication</li> <li>- PII reformatting</li> </ul> <p>For FineWeb-Edu, we further apply a filtering step based on our educational content classifier.</p>                                                                                                                                                                                                                                                                                                        |
| Annotations                        | We augment the original samples with the language, language_score and tokens_count annotations. The language related annotations are automatically generated by our language filter. token_count is generated by applying the GPT-2 tokenizer to the text column.                                                                                                                                                                                                                                                                                                                                                                                                                                                                                                                                |
| Personal and Sensitive Information | We anonymize email addresses and public IP addresses using regex patterns.                                                                                                                                                                                                                                                                                                                                                                                                                                                                                                                                                                                                                                                                                                                       |

| <b>Considerations for Using the Data</b> |                                                                                                                                                                                                                                                                                                                                                                                                                                                                                                                                                                                                                                                                                                                                                                                                                                                                             |
|------------------------------------------|-----------------------------------------------------------------------------------------------------------------------------------------------------------------------------------------------------------------------------------------------------------------------------------------------------------------------------------------------------------------------------------------------------------------------------------------------------------------------------------------------------------------------------------------------------------------------------------------------------------------------------------------------------------------------------------------------------------------------------------------------------------------------------------------------------------------------------------------------------------------------------|
| Social Impact of Dataset                 | <p>With the release of FineWeb, we aim to make LLM training more accessible to the machine learning community by:</p> <ul style="list-style-type: none"> <li>(a) making the dataset creation process more transparent, by sharing our entire processing setup including the codebase used</li> <li>(b) helping alleviate the costs of dataset curation, both in time and in compute, for model creators by publicly releasing our dataset with the community.</li> </ul>                                                                                                                                                                                                                                                                                                                                                                                                    |
| Biases                                   | <p>Efforts were made to minimize the amount of NSFW and toxic content present in the dataset by employing filtering on the URL level. However, there are still a significant number of documents present in the final dataset that could be considered to be toxic or contain harmful content. As FineWeb was sourced from the web as a whole, any harmful biases typically present in the web may be reproduced on our dataset. Bias analyses for sensitive subgroups demonstrate that ‘man’ is more common in the dataset than other gender terms, ‘christian’ is more common than other religion terms. The disproportionate association of specific terms to sensitive subgroups is relatively low, with the most notable bias that some religion terms tend to be more associated with online dating terms. We provide a more detailed bias analysis in Section 5.</p> |
| Other Known Limitations                  | <p>As a consequence of some of the filtering steps applied, it is likely that code content is not prevalent in our dataset. Users are advised to consider complementing FineWeb with other code datasets and specialized curated sources, such as Wikipedia, which may have better formatting than the Wikipedia content included in FineWeb.</p>                                                                                                                                                                                                                                                                                                                                                                                                                                                                                                                           |

## **B License and hosting**

The FineWeb datasets are released under the Open Data Commons Attribution License (ODC-By) v1.0. The full text of the license is available at <https://opendatacommons.org/licenses/by/1-0/>. The use of the dataset is also subject to [CommonCrawl’s Terms of Use](#). The authors of this work are solely responsible for the content and the views presented herein. NeurIPS is not associated and shall bear no responsibility for the work presented, including the dataset itself.

The FineWeb datasets are hosted on the [HuggingFace hub](#), where they will remain available for the foreseeable future. We plan to regularly update the dataset with new CommonCrawl snapshots as they are released.

## C Linked resources

| Resource                                                                                                                                | URL                                                                                                                                                                                                                                                                                                                                                                                                                                                                                                                                                                                |
|-----------------------------------------------------------------------------------------------------------------------------------------|------------------------------------------------------------------------------------------------------------------------------------------------------------------------------------------------------------------------------------------------------------------------------------------------------------------------------------------------------------------------------------------------------------------------------------------------------------------------------------------------------------------------------------------------------------------------------------|
| FineWeb repository (DOI 10.57967/hf/2493)<br>FineWeb Croissant metadata                                                                 | <a href="https://hf.co/datasets/HuggingFaceFW/fineweb">https://hf.co/datasets/HuggingFaceFW/fineweb</a><br><a href="https://hf.co/api/datasets/HuggingFaceFW/fineweb/croissant">https://hf.co/api/datasets/HuggingFaceFW/fineweb/croissant</a>                                                                                                                                                                                                                                                                                                                                     |
| FineWeb-Edu repository (DOI 10.57967/hf/2497)<br>FineWeb-Edu Croissant metadata<br>FineWeb Llama3 annotations<br>Educational classifier | <a href="https://hf.co/datasets/HuggingFaceFW/fineweb-edu">https://hf.co/datasets/HuggingFaceFW/fineweb-edu</a><br><a href="https://hf.co/api/datasets/HuggingFaceFW/fineweb-edu/croissant">https://hf.co/api/datasets/HuggingFaceFW/fineweb-edu/croissant</a><br><a href="https://huggingface.co/datasets/HuggingFaceFW/fineweb-edu-llama3-annotations">https://huggingface.co/datasets/HuggingFaceFW/fineweb-edu-llama3-annotations</a><br><a href="https://huggingface.co/HuggingFaceFW/fineweb-edu-classifier">https://huggingface.co/HuggingFaceFW/fineweb-edu-classifier</a> |
| Dataset comparison models<br>Ablation models                                                                                            | <a href="https://hf.co/collections/HuggingFaceFW/comparison-models-662457b0d213e8c14fe47f32">https://hf.co/collections/HuggingFaceFW/comparison-models-662457b0d213e8c14fe47f32</a><br><a href="https://hf.co/collections/HuggingFaceFW/data-experiments-665ed849020d8b66a5d9896f">https://hf.co/collections/HuggingFaceFW/data-experiments-665ed849020d8b66a5d9896f</a>                                                                                                                                                                                                           |
| Datatrove processing code to reproduce FineWeb<br>Evaluation setup                                                                      | <a href="https://github.com/huggingface/datatrove/blob/main/examples/fineweb.py">https://github.com/huggingface/datatrove/blob/main/examples/fineweb.py</a><br><a href="https://hf.co/datasets/HuggingFaceFW/fineweb/blob/main/lighteval_tasks.py">https://hf.co/datasets/HuggingFaceFW/fineweb/blob/main/lighteval_tasks.py</a>                                                                                                                                                                                                                                                   |

## D Data ablation setup

### D.1 Model architecture

| Parameter                  | Value |
|----------------------------|-------|
| Architecture               | Llama |
| Number of attention heads  | 32    |
| Number of hidden layers    | 24    |
| Number of key-value heads  | 32    |
| RMS Norm epsilon           | 1e-05 |
| Tied word embeddings       | True  |
| Embedding size             | 50257 |
| Total number of parameters | 1.71B |
| Random initialization std  | 0.02  |
| Tokenizer                  | GPT2  |

## D.2 Distributed training setup

| Parameter                      | Value |
|--------------------------------|-------|
| Data parallelism (dp)          | 64    |
| Tensor parallelism (tp)        | 1     |
| Pipeline parallelism (pp)      | 1     |
| Micro-batch size               | 4     |
| Sequence length                | 2048  |
| Batch accumulation per replica | 4     |

## D.3 Optimizer Configuration

| Parameter         | Value  |
|-------------------|--------|
| Adam beta1        | 0.9    |
| Adam beta2        | 0.95   |
| Adam epsilon      | 1.0e-8 |
| Gradient clipping | 1.0    |
| Weight decay      | 0.1    |
| Learning rate     | 3e-4   |
| Warmup steps      | 500    |
| Warmup style      | linear |
| Decay style       | cosine |
| Minimum decay LR  | 3.0e-5 |

## E Deduplication

### E.1 Deduplication parameters

As mentioned in Section 3.4, we use 5-grams and 112 hash functions for our MinHash deduplication. Each 5-gram is hashed with each of the 112 hash functions, and a document signature is obtained by taking the minimum hash value (minhash) across all 5-grams for each hash function. We further split the resulting 112 minhashes into 14 buckets of 8 hashes each. Documents are matched if they have the same 8 minhashes in at least one of the 14 buckets.

With these parameters, the probability that two documents with a n-gram similarity ( $s$ ) of 0.7, 0.75, 0.8 and 0.85 would be identified as duplicates would be 56%, 77%, 92% and 98.8%, respectively. This split therefore will match documents that are at least 75% similar with a high probability, and almost guarantee that documents with similarities of 85% or above will be matched. These values can be computed by taking the following probabilities: that the two documents would have the same value for a given hash function,  $s$ ; that they do not have the same 8 minhashes in one bucket,  $1 - s^8$ ; that they do not have the same 8 minhashes in any of the 14 buckets,  $(1 - s^8)^{14}$ ; and finally that they have the same 8 minhashes on at least one of the 14 buckets,  $1 - (1 - s^8)^{14}$ .

See Fig. 13 for a match probability comparison between our setup with 112 hashes and the one from RefinedWeb, with 9000 hashes, divided into 450 buckets of 20 hashes.

While the high number of hash functions in RefinedWeb allows for a steeper, more well-defined cut off (document pairs with similarity near the threshold are more likely to be correctly identified), this

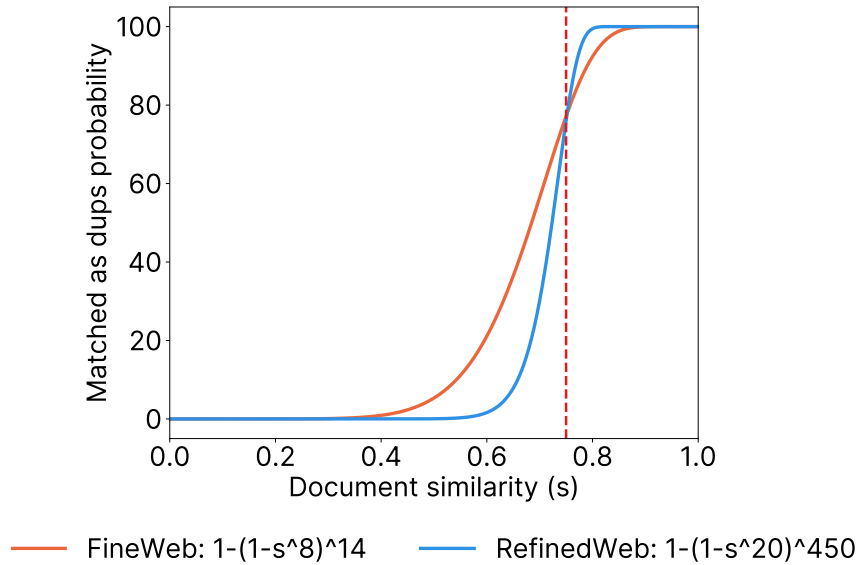

Figure 13: Comparison between FineWeb and RefinedWeb document matching probabilities.

larger number of hash functions also requires a substantially larger amount of compute resources, as each individual hash must be computed, stored, and then compared with hashes from other documents. We believe the compute and storage savings make up for the higher uncertainty on documents near the threshold.

## E.2 Measuring the effect of deduplication

Given the nature of deduplication, its effect is not always visible in a smaller slice of the dataset (such as 28B tokens, the size used for our filtering ablations). Furthermore, there are specific effects at play when deduplicating across different Common Crawl dumps, as some URLs and webpages are recrawled from one snapshot to the next.

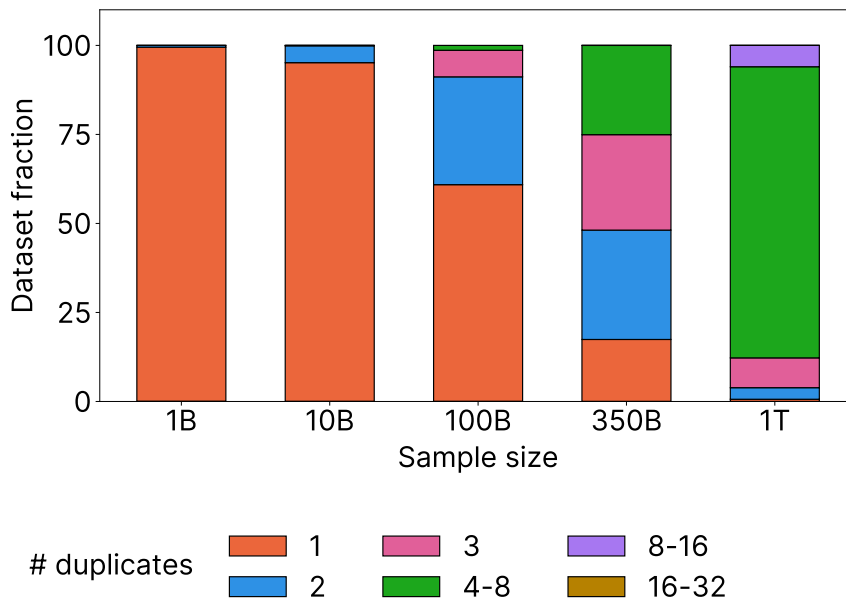

Figure 14: **Small ablations are ineffective for deduplication analysis.** The chart displays the distribution of document repetitions across different sample sizes (1 billion, 10 billion, 100 billion, 350 billion, and 1 trillion tokens) from a dataset of 20T tokens.

To visualize the effect of scaling the number of training tokens when measuring deduplication impact, we simulated creating different-sized subsets of randomly sampled documents from the full dataset under the following extreme conditions: there are 100 snapshots, where each one is made up of unique documents with a total of 200 billion tokens (yielding our total of 20 trillion from Section 3.4), and each snapshot is an exact copy of each other (worst case scenario for inter snapshot duplication).

In Fig. 14, we can see that for a 1 billion subset, almost all documents would be unique ( $\#duplicates=1$ ), despite each document being repeated 100 times in the full dataset. At the 100 billion scale (0.5% of the total dataset), there starts to be a larger number of documents being repeated twice, and a few even 4-8 times. At the larger scale of 1 trillion (5% of the total dataset), the majority of the documents are repeated up to 8 times, with some being repeated up to 16 times. This simulation illustrates the inherent difficulties with measuring deduplication impact on the training of larger LLMs once the largest duplicate clusters have been removed. We ran our performance evaluations for deduplicated data at the 350 billion scale, which would, under this theoretical scenario, be made up of a significant portion of documents duplicated up to 8 times.

### E.3 Alternative global deduplication

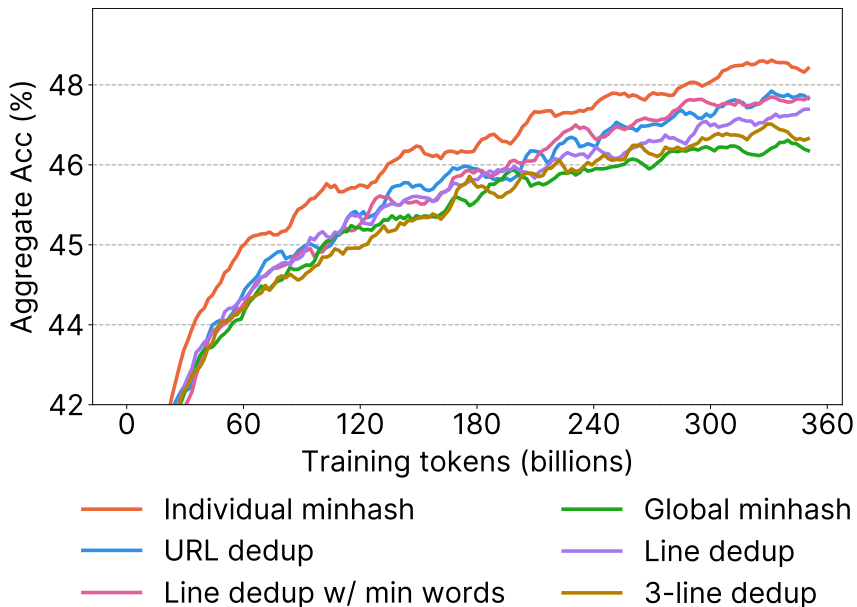

Figure 15: **URL and Line-wise deduplication study.** None of the attempted deduplication methods outperform individual deduplication.

To attempt to improve performance on top of independently deduplicating each snapshot, we experimented with applying other “lighter” global deduplication methods to all the individually MinHash deduplicated snapshots (comprising 20 trillion tokens of data).

We explored URL deduplication, where we only kept one document per normalized (lowercased) URL (71.5% of tokens removed, 5.6 trillion left) — *FineWeb URL dedup*. Different line-based deduplication variations were also considered: remove all but 1 (randomly chosen) occurrence of each duplicated line (77.8% of tokens dropped, 4.4 trillion left) — *FineWeb line dedup*; same as above, but only removing duplicate lines with at least 10 words and dropping documents with fewer than 3 sentences after deduplication (85% of tokens dropped, 2.9 trillion left) — *FineWeb line dedup w/ min words*; and remove all but 1 occurrence of each span of 3 duplicated lines with each number treated as 0 when finding duplicates, (80.9% of tokens removed, 3.7 trillion left) — *FineWeb 3-line dedup*.

As can be seen in Fig. 15 the performance of the models trained on each of these methods was consistently worse (albeit to different degrees) than that of the original individually deduplicated data. We therefore did not apply any additional deduplication beyond individual-snapshot MinHash-based deduplication.

#### E.4 Other filters considered

| Metric                            | Threshold                                    | Aggregate Acc (%) | Tokens removed (%) |
|-----------------------------------|----------------------------------------------|-------------------|--------------------|
| lines-with-punct-ratio            | $\geq 0.12$                                  | 42.85             | 10.14              |
| duplicated-line-char-ratio        | $\leq 0.01$                                  | 42.78             | 12.47              |
| lines-with-punct-ratio            | $\geq 0.12$ or = 0                           | 42.72             | 5.82               |
| lines-shorter-30-ratio            | $\leq 0.67$                                  | 42.65             | 3.37               |
| line-with-most-3-words-ratio      | $\leq 0.49$                                  | 42.61             | 2.51               |
| duplicate-(5-10)-grams-char-ratio | $\leq 0.1, 0.084, 0.073, 0.065, 0.057, 0.05$ | 42.60             | 10.92              |
| lines-with-punct-ratio            | $\geq 0.08$ or = 0                           | 42.59             | 3.42               |
| top-(2,3,4)-gram-char-ratio       | $\leq 0.13, 0.087, 0.079$                    | 42.58             | 56.71              |
| lines-shorter-30-ratio            | 0.69                                         | 42.58             | 3.73               |
| avg-words-per-line                | $\geq 7$                                     | 42.56             | 2.32               |
| lines-shorter-30-ratio            | $\leq 0.5$                                   | 42.53             | 11.17              |
| avg-words-per-line                | $\geq 5$                                     | 42.39             | 0.83               |
| avg-words-per-line                | $\geq 9$                                     | 42.27             | 4.47               |
| avg-line-length-0.5-sampling      | $\geq 56$                                    | 42.93             | 3.24               |
| avg-line-length                   | $\geq 56$                                    | 42.12             | 6.48               |
| avg-line-length-0.5-sampling      | $\geq 40$                                    | 42.03             | 1.50               |

Table 2: Full list of heuristic filters tested



## F FineWeb-Edu

### F.1 Annotation Prompt

We use the following prompt template to generate document annotations using the Llama3 model:

Below is an extract from a web page. Evaluate whether the page has a high educational value and could be useful in an educational setting for teaching from primary school to grade school levels using the additive 5-point scoring system described below. Points are accumulated based on the satisfaction of each criterion:

- Add 1 point if the extract provides some basic information relevant to educational topics, even if it includes some irrelevant or non-academic content like advertisements and promotional material.
- Add another point if the extract addresses certain elements pertinent to education but does not align closely with educational standards. It might mix educational content with non-educational material, offering a superficial overview of potentially useful topics, or presenting information in a disorganized manner and incoherent writing style.
- Award a third point if the extract is appropriate for educational use and introduces key concepts relevant to school curricula. It is coherent though it may not be comprehensive or could include some extraneous information. It may resemble an introductory section of a textbook or a basic tutorial that is suitable for learning but has notable limitations like treating concepts that are too complex for grade school students.
- Grant a fourth point if the extract is highly relevant and beneficial for educational purposes for a level not higher than grade school, exhibiting a clear and consistent writing style. It could be similar to a chapter from a textbook or a tutorial, offering substantial educational content, including exercises and solutions, with minimal irrelevant information, and the concepts aren't too advanced for grade school students. The content is coherent, focused, and valuable for structured learning.
- Bestow a fifth point if the extract is outstanding in its educational value, perfectly suited for teaching either at primary school or grade school. It follows detailed reasoning, the writing style is easy to follow and offers profound and thorough insights into the subject matter, devoid of any non-educational or complex content.

The extract: <EXAMPLE>.

After examining the extract:

- Briefly justify your total score, up to 100 words.
- Conclude with the score using the format: "Educational score: <total points>"

### F.2 Additional results

Fig. 16 compares FineWeb-Edu to other open web datasets on 9 benchmarks, using a 1.71B model trained on 350 billion tokens. Additionally, Fig. 17 displays the results of experiments with various filtering thresholds for building FineWeb-Edu, using a 1.71B model trained on 28 billion tokens. Our findings indicate that a threshold of 3 yields the best average performance.

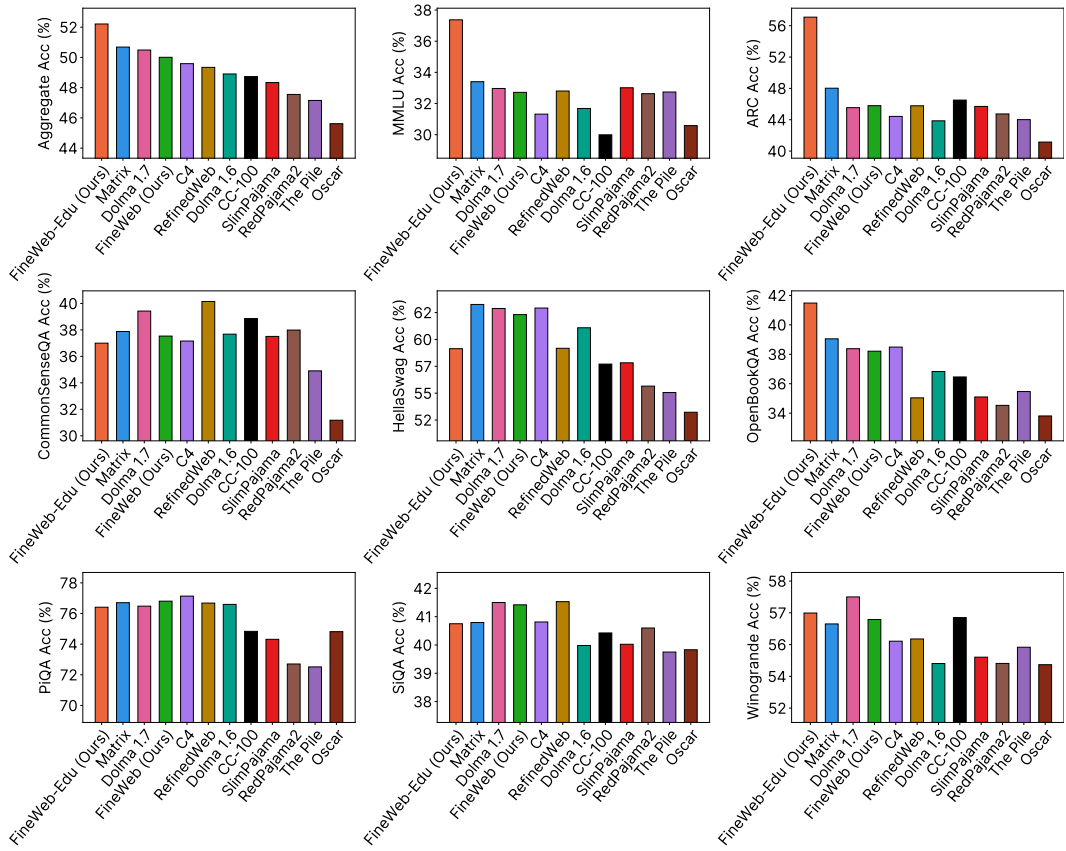

Figure 16: Comparing FineWeb datasets to other public datasets on each benchmark.

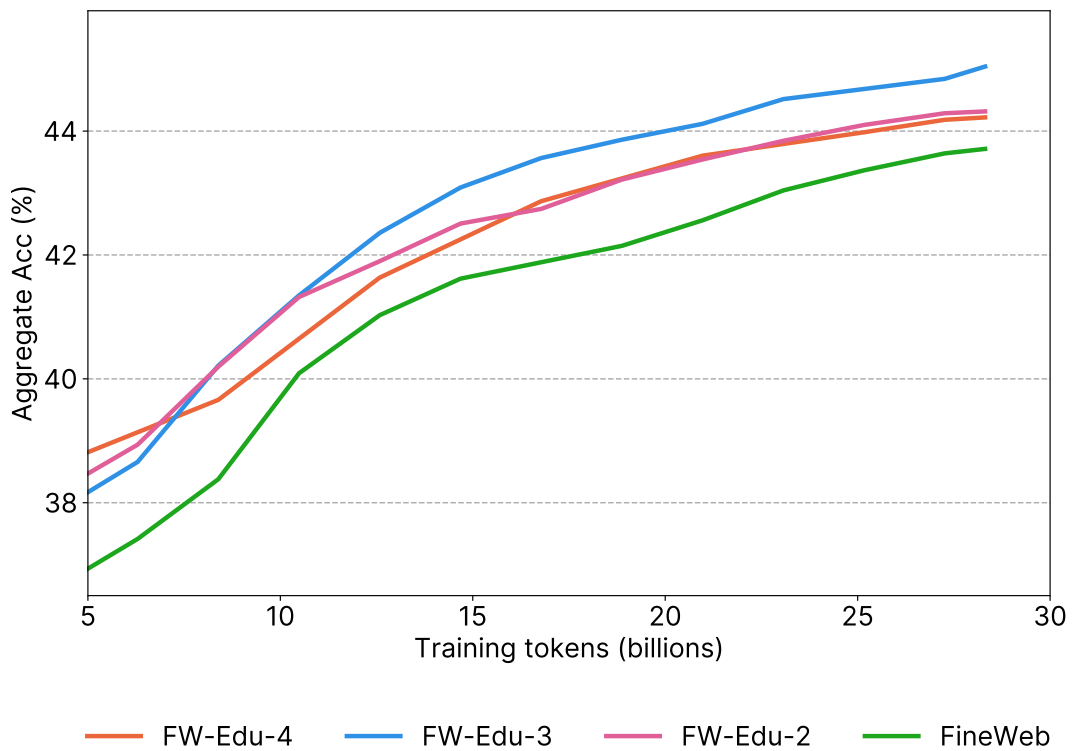

Figure 17: **Ablation study of FineWeb Edu thresholds.** Using a filtering threshold of 3 yields the best Aggregate Accuracy when building FineWeb-Edu. FW-Edu- $i$  denotes dataset filtered to only contain documents with an educational score greater or equal  $i$ .

### E.3 Topic distribution

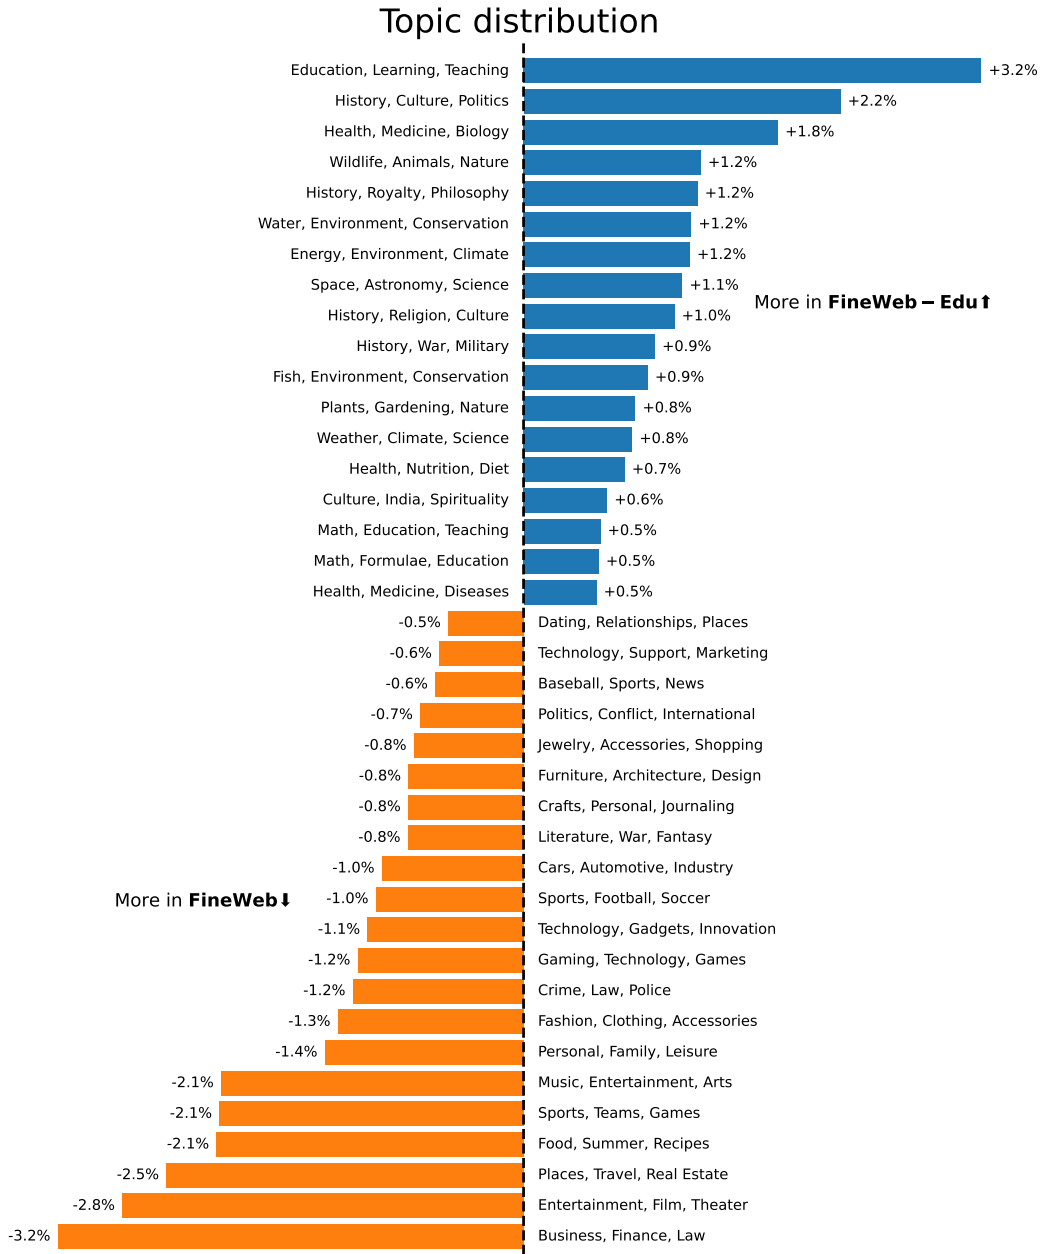

Figure 18: **FineWeb and FineWeb-Edu topic comparison.** FineWeb-Edu has a higher representation of topics like 'Education, Learning, Teaching' and 'History, Culture, Politics' compared to FineWeb. Conversely, it down-samples topics such as 'Business, Finance, Law' and 'Entertainment, Film, Theater.' Values indicate the absolute difference in the percentage of each topic between the datasets and only topics with an absolute difference of at least 0.5% are displayed.

#### F.4 Domain fit

| Source         | Domain                                             | FineWeb ppl   | FineWeb-Edu ppl |
|----------------|----------------------------------------------------|---------------|-----------------|
| Dolma V1.5     | common-crawl                                       | <b>14.499</b> | 18.336          |
| Dolma V1.5     | pes2o                                              | 12.226        | <b>10.242</b>   |
| Dolma V1.5     | reddit uniform                                     | <b>23.814</b> | 29.864          |
| Dolma V1.5     | stack uniform                                      | 7.65          | <b>7.014</b>    |
| Dolma V1.5     | wiki                                               | <b>12.0</b>   | 12.243          |
| M2D2 Wikipedia | Culture and the arts                               | <b>10.367</b> | 14.518          |
| M2D2 Wikipedia | Culture and the arts Culture and Humanities        | <b>14.037</b> | 14.116          |
| M2D2 Wikipedia | Culture and the arts Games and Toys                | <b>15.774</b> | 18.912          |
| M2D2 Wikipedia | Culture and the arts Mass media                    | <b>14.352</b> | 18.134          |
| M2D2 Wikipedia | Culture and the arts Performing arts               | 14.311        | <b>13.313</b>   |
| M2D2 Wikipedia | Culture and the arts Sports and Recreation         | <b>11.295</b> | 14.735          |
| M2D2 Wikipedia | Culture and the arts The arts and Entertainment    | <b>13.669</b> | 19.039          |
| M2D2 Wikipedia | Culture and the arts Visual arts                   | <b>14.967</b> | 15.158          |
| M2D2 Wikipedia | General referece                                   | 11.962        | <b>11.246</b>   |
| M2D2 Wikipedia | General referece Further research tools and topics | <b>16.202</b> | 19.191          |
| M2D2 Wikipedia | General referece Reference works                   | <b>14.914</b> | 18.621          |
| M2D2 Wikipedia | Health and fitness                                 | <b>12.0</b>   | 13.448          |
| M2D2 Wikipedia | Health and fitness Exercise                        | <b>11.874</b> | 13.951          |
| M2D2 Wikipedia | Health and fitness Health science                  | 11.509        | <b>10.997</b>   |
| M2D2 Wikipedia | Health and fitness Human medicine                  | <b>12.0</b>   | 13.448          |
| M2D2 Wikipedia | Health and fitness Nutrition                       | 10.09         | <b>8.489</b>    |
| M2D2 Wikipedia | Health and fitness Public health                   | 12.804        | <b>11.797</b>   |
| M2D2 Wikipedia | Health and fitness Self care                       | 14.62         | <b>12.782</b>   |
| M2D2 Wikipedia | History and events                                 | 13.446        | <b>12.516</b>   |
| M2D2 Wikipedia | History and events By continent                    | 14.174        | <b>12.066</b>   |
| M2D2 Wikipedia | History and events By period                       | 12.94         | <b>11.0</b>     |
| M2D2 Wikipedia | History and events By region                       | 13.61         | <b>11.63</b>    |
| M2D2 Wikipedia | Human activites                                    | <b>15.159</b> | 18.728          |
| M2D2 Wikipedia | Human activites Human activities                   | 12.784        | <b>11.117</b>   |
| M2D2 Wikipedia | Human activites Impact of human activity           | 15.092        | <b>13.592</b>   |
| M2D2 Wikipedia | Mathematics and logic                              | 12.703        | <b>9.903</b>    |
| M2D2 Wikipedia | Mathematics and logic Fields of mathematics        | 12.703        | <b>9.903</b>    |
| M2D2 Wikipedia | Mathematics and logic Logic                        | 14.281        | <b>13.367</b>   |
| M2D2 Wikipedia | Mathematics and logic Mathematics                  | 14.923        | <b>14.207</b>   |
| M2D2 Wikipedia | Natural and physical sciences                      | 12.884        | <b>10.529</b>   |
| M2D2 Wikipedia | Natural and physical sciences Biology              | 12.718        | <b>10.221</b>   |
| M2D2 Wikipedia | Natural and physical sciences Earth sciences       | 15.346        | <b>13.145</b>   |

| Source         | Domain                                                 | FineWeb ppl    | FineWeb-Edu ppl |
|----------------|--------------------------------------------------------|----------------|-----------------|
| M2D2 Wikipedia | Natural and physical sciences Nature                   | 12.594         | <b>9.886</b>    |
| M2D2 Wikipedia | Natural and physical sciences Physical sciences        | 13.088         | <b>10.643</b>   |
| M2D2 Wikipedia | Philosophy and thinking                                | <b>14.081</b>  | 16.067          |
| M2D2 Wikipedia | Philosophy and thinking Philosophy                     | 14.209         | <b>12.91</b>    |
| M2D2 Wikipedia | Philosophy and thinking Thinking                       | <b>14.081</b>  | 16.067          |
| M2D2 Wikipedia | Religion and belief systems                            | 12.636         | <b>11.326</b>   |
| M2D2 Wikipedia | Religion and belief systems Allah                      | 14.072         | <b>10.808</b>   |
| M2D2 Wikipedia | Religion and belief systems Belief systems             | 12.843         | <b>11.652</b>   |
| M2D2 Wikipedia | Religion and belief systems Major beliefs of the world | 13.824         | <b>11.834</b>   |
| M2D2 Wikipedia | Society and social sciences                            | 11.777         | <b>11.195</b>   |
| M2D2 Wikipedia | Society and social sciences Social sciences            | <b>11.81</b>   | 13.03           |
| M2D2 Wikipedia | Society and social sciences Society                    | 11.777         | <b>11.195</b>   |
| M2D2 Wikipedia | Technology and applied sciences                        | 11.592         | <b>9.368</b>    |
| M2D2 Wikipedia | Technology and applied sciences Agriculture            | <b>13.941</b>  | 14.998          |
| M2D2 Wikipedia | Technology and applied sciences Computing              | <b>15.562</b>  | 16.091          |
| M2D2 Wikipedia | Technology and applied sciences Engineering            | 14.897         | <b>13.861</b>   |
| M2D2 Wikipedia | Technology and applied sciences Transport              | <b>16.519</b>  | 17.886          |
| Manosphere     | avfm                                                   | <b>27.332</b>  | 32.058          |
| Manosphere     | incels                                                 | <b>18.253</b>  | 20.788          |
| Manosphere     | love shy                                               | <b>28.206</b>  | 33.374          |
| Manosphere     | mgtow                                                  | <b>24.913</b>  | 29.702          |
| Manosphere     | pua forum                                              | <b>25.133</b>  | 33.297          |
| Manosphere     | red pill talk                                          | <b>33.87</b>   | 42.947          |
| Manosphere     | reddit                                                 | <b>24.786</b>  | 30.903          |
| Manosphere     | rooshv                                                 | <b>23.593</b>  | 27.819          |
| Manosphere     | the attraction                                         | <b>24.988</b>  | 30.907          |
| RedPajama      | arxiv                                                  | 32.338         | <b>23.368</b>   |
| RedPajama      | books                                                  | <b>22.095</b>  | 23.953          |
| RedPajama      | c4                                                     | <b>12.685</b>  | 15.599          |
| RedPajama      | commoncrawl                                            | <b>8.0</b>     | 8.979           |
| RedPajama      | github                                                 | 5.613          | <b>5.247</b>    |
| RedPajama      | stackexchange                                          | 9.055          | <b>8.862</b>    |
| RedPajama      | wikipedia                                              | 8.741          | <b>8.608</b>    |
| Twitter AAE    | AA                                                     | <b>246.907</b> | 575.106         |
| Twitter AAE    | white                                                  | <b>98.536</b>  | 192.374         |

Table 3: **Paloma domain comparison between FineWeb and FineWeb-Edu.** Lower perplexity (ppl) in bold. A lower perplexity value indicates a better fit to a given domain.

## G Bias Analyses

### G.1 Distributional Analysis

| Subgroup        | Terms                                                           |
|-----------------|-----------------------------------------------------------------|
| <i>age</i>      | 'old', 'young'                                                  |
| <i>gender</i>   | 'man', 'woman', 'non-binary'                                    |
| <i>religion</i> | 'muslim', 'christian', 'jewish', 'hindu', 'buddhist', 'atheist' |

Table 4: Subgroups and terms used for bias analyses.

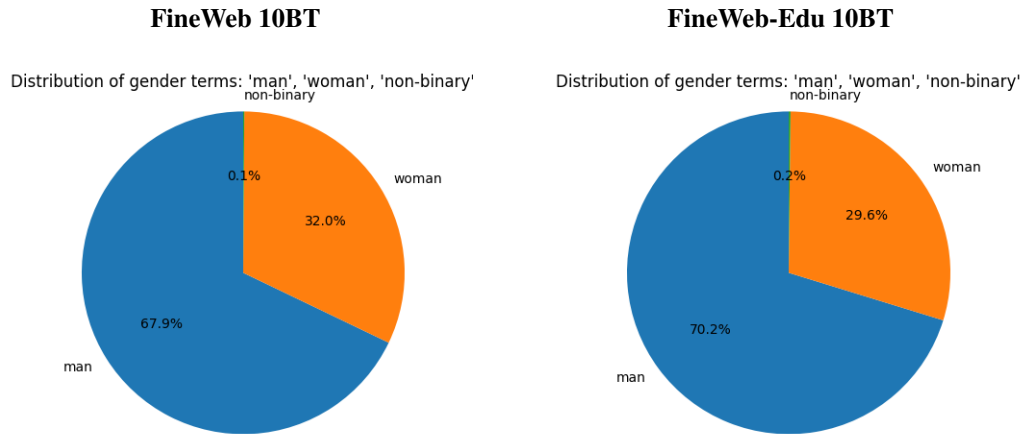

Figure 19: Distribution of *gender* terms in FineWeb (Left) and FineWeb-Edu (Right), 10BT samples.

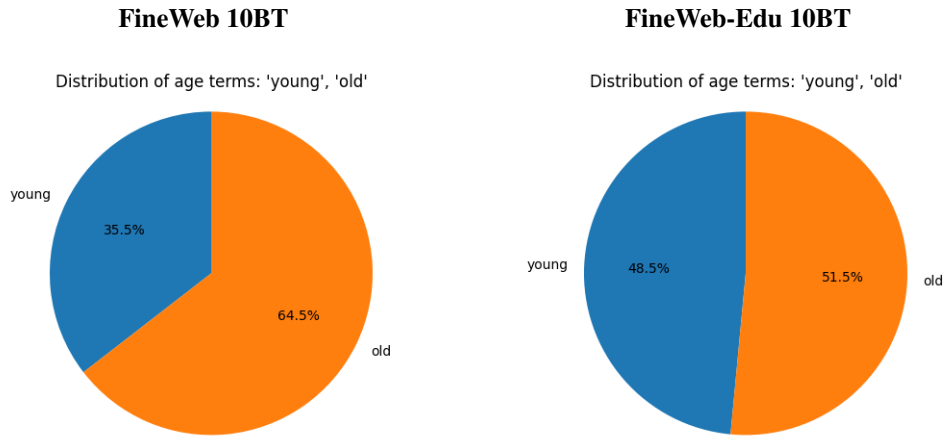

Figure 20: Distribution of *age* terms in FineWeb (Left) and FineWeb-Edu (Right), 10BT samples.

To begin, we examine the distribution over subgroup terms for *gender* (Fig. 19) *age* (Fig. 20), and *religion* (Fig. 21) in a subset of FineWeb and FineWeb-Edu randomly sampled from the whole dataset, of around 10 Billion GPT-2 tokens (FineWeb 10BT and FineWeb-Edu 10BT). Terms used are shown in Table 4 and are all normalized to lowercase for this analysis.

We find that 'man' appears much more frequently than 'woman' and 'non-binary', and 'christian' appears much more frequently than all other religions terms tested.

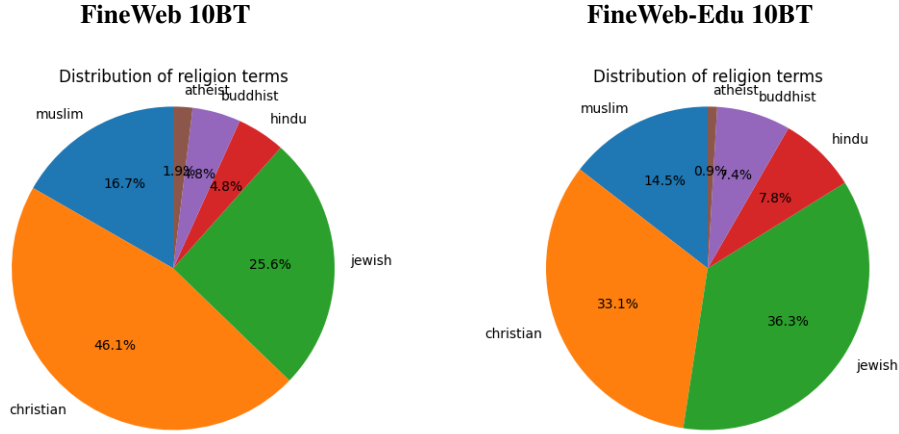

Figure 21: Distribution of *religion* terms in FineWeb (Left) and FineWeb-Edu (Right), 10BT samples.

## G.2 Association Analysis

We next examine the skews with respect to the different subgroup terms, as measured by TF-IDF [78]. This method is described as capturing the *specificity* of words in the dataset, here applied as specificity with respect to the terms for the different subgroups. This provides a way to quantify how “biased” each subgroup term is with respect to the words they co-occur with. Specifically, given the dataset and terms for a subgroup of interest, we:

1. Build a vocabulary of all words that occur at least twice in the dataset.
2. Extract all data instances where the subgroup term is present.
3. Compute the TF-IDF for all words in the vocabulary that co-occur in the same documents as a given subgroup term.
4. Compute the difference between the TF-IDF for the given subgroup terms and the average TF-IDF of all other words they co-occur with.
5. Extract the words co-occurring with the given subgroup terms with a TF-IDF greater than 0.

### G.2.1 Gender

We find that ‘man’ is associated with terms such as ‘god’, ‘police’, ‘said’ and ‘good’, ‘woman’ is associated with terms like ‘said’, ‘women’, ‘police’, ‘life’, ‘love’, ‘dating’ and ‘family’, and ‘non-binary’ is associated with ‘gender’ and LGBTQIA+ terms such as ‘trans’, ‘transgender’, and ‘queer’ (Fig. 22). Applying this same analysis to FineWeb-Edu-Sample-10BT, we find that ‘man’ is associated with the term ‘god’, and slightly associated with terms like ‘war’, ‘great’, and ‘king’. ‘woman’ is associated with terms like ‘pregnancy’, ‘cancer’, ‘mother’, ‘children’, and ‘family’.

### G.2.2 Religion

Throughout, we see skews towards words associated with online intimacy: ‘online’, ‘singles’, ‘sex’, ‘mature’, ‘girls’. As can be seen in Fig. 27, ‘jewish’ is particularly associated with ‘dating’ and ‘singles’. ‘muslim’, ‘jewish’, ‘hindu’ and ‘buddhist’ are slightly skewed to co-occur with ‘women’, while ‘sex’ is skewed with ‘muslim’, ‘christian’, ‘jewish’; and ‘girl’ with ‘muslim’, ‘jewish’, ‘hindu’.

### G.2.3 Age

The word ‘young’ is skewed to co-occur with ‘women’, consistent with the problematic tendencies in English-speaking societies to infantilize women and over-indexing on womens’ youth [79, 80]. We also see expected skews, such as ‘young’ co-occurring with words like ‘children’ and ‘school’.



| word        | non-binary | non-binary+ | man   | man+   | woman | woman+ |
|-------------|------------|-------------|-------|--------|-------|--------|
| non-binary  | 0.092      | 0.061       | 0.000 | -0.031 | 0.000 | -0.031 |
| gender      | 0.068      | 0.044       | 0.001 | -0.023 | 0.003 | -0.021 |
| trans       | 0.055      | 0.037       | 0.000 | -0.018 | 0.001 | -0.018 |
| transgender | 0.035      | 0.023       | 0.000 | -0.012 | 0.001 | -0.011 |
| queer       | 0.033      | 0.021       | 0.000 | -0.011 | 0.001 | -0.011 |
| people      | 0.044      | 0.016       | 0.018 | -0.009 | 0.020 | -0.007 |
| women       | 0.044      | 0.015       | 0.011 | -0.018 | 0.031 | 0.003  |
| lgbtq       | 0.020      | 0.013       | 0.000 | -0.007 | 0.000 | -0.006 |
| community   | 0.020      | 0.011       | 0.004 | -0.006 | 0.004 | -0.005 |
| sexual      | 0.017      | 0.008       | 0.003 | -0.005 | 0.006 | -0.003 |
| female      | 0.016      | 0.007       | 0.003 | -0.006 | 0.006 | -0.002 |
| sex         | 0.019      | 0.006       | 0.007 | -0.006 | 0.012 | -0.001 |
| work        | 0.016      | 0.004       | 0.009 | -0.003 | 0.010 | -0.002 |
| person      | 0.014      | 0.004       | 0.007 | -0.003 | 0.008 | -0.001 |
| feel        | 0.012      | 0.003       | 0.006 | -0.003 | 0.008 | -0.001 |
| dating      | 0.015      | 0.002       | 0.009 | -0.004 | 0.015 | 0.002  |
| ve          | 0.012      | 0.002       | 0.009 | -0.001 | 0.010 | -0.000 |
| new         | 0.015      | 0.001       | 0.013 | -0.001 | 0.013 | -0.000 |
| like        | 0.022      | 0.001       | 0.019 | -0.002 | 0.021 | 0.000  |
| men         | 0.015      | 0.001       | 0.013 | -0.001 | 0.014 | -0.000 |
| want        | 0.012      | 0.001       | 0.009 | -0.002 | 0.011 | 0.000  |
| world       | 0.013      | 0.001       | 0.011 | -0.000 | 0.011 | -0.001 |
| really      | 0.012      | 0.001       | 0.010 | -0.001 | 0.011 | 0.000  |
| year        | 0.010      | 0.001       | 0.008 | -0.000 | 0.008 | -0.001 |
| young       | 0.010      | 0.001       | 0.008 | -0.001 | 0.009 | 0.000  |

  

| word   | woman | woman+ | non-binary | non-binary+ | man   | man+   |
|--------|-------|--------|------------|-------------|-------|--------|
| woman  | 0.051 | 0.026  | 0.011      | -0.013      | 0.011 | -0.013 |
| said   | 0.022 | 0.004  | 0.011      | -0.007      | 0.022 | 0.004  |
| women  | 0.031 | 0.003  | 0.044      | 0.015       | 0.011 | -0.018 |
| police | 0.012 | 0.003  | 0.003      | -0.007      | 0.014 | 0.004  |
| life   | 0.017 | 0.002  | 0.011      | -0.003      | 0.015 | 0.001  |
| love   | 0.015 | 0.002  | 0.012      | -0.001      | 0.012 | -0.001 |
| dating | 0.015 | 0.002  | 0.015      | 0.002       | 0.009 | -0.004 |
| family | 0.010 | 0.002  | 0.007      | -0.002      | 0.009 | -0.000 |
| did    | 0.011 | 0.002  | 0.006      | -0.003      | 0.012 | 0.002  |
| just   | 0.019 | 0.002  | 0.015      | -0.002      | 0.018 | 0.000  |
| know   | 0.015 | 0.002  | 0.012      | -0.002      | 0.014 | 0.000  |
| time   | 0.017 | 0.001  | 0.013      | -0.002      | 0.017 | 0.001  |
| day    | 0.012 | 0.001  | 0.008      | -0.002      | 0.011 | 0.001  |
| good   | 0.011 | 0.001  | 0.007      | -0.003      | 0.012 | 0.002  |
| story  | 0.011 | 0.001  | 0.009      | -0.001      | 0.009 | -0.000 |
| going  | 0.010 | 0.001  | 0.007      | -0.002      | 0.010 | 0.001  |
| say    | 0.010 | 0.001  | 0.008      | -0.002      | 0.010 | 0.001  |
| god    | 0.012 | 0.001  | 0.003      | -0.008      | 0.018 | 0.007  |
| years  | 0.012 | 0.001  | 0.010      | -0.001      | 0.011 | 0.001  |
| don    | 0.014 | 0.001  | 0.013      | 0.000       | 0.012 | -0.001 |
| book   | 0.010 | 0.001  | 0.009      | -0.000      | 0.008 | -0.001 |
| right  | 0.009 | 0.001  | 0.008      | -0.001      | 0.009 | 0.000  |

A

B

| word   | man   | man+  | woman | woman+ | non-binary | non-binary+ |
|--------|-------|-------|-------|--------|------------|-------------|
| man    | 0.046 | 0.022 | 0.019 | -0.005 | 0.007      | -0.017      |
| god    | 0.018 | 0.007 | 0.012 | 0.001  | 0.003      | -0.008      |
| police | 0.014 | 0.004 | 0.012 | 0.003  | 0.003      | -0.007      |
| said   | 0.022 | 0.004 | 0.022 | 0.004  | 0.011      | -0.007      |
| good   | 0.012 | 0.002 | 0.011 | 0.001  | 0.007      | -0.003      |
| did    | 0.012 | 0.002 | 0.011 | 0.002  | 0.006      | -0.003      |
| say    | 0.010 | 0.001 | 0.010 | 0.001  | 0.008      | -0.002      |
| time   | 0.017 | 0.001 | 0.017 | 0.001  | 0.013      | -0.002      |
| day    | 0.011 | 0.001 | 0.012 | 0.001  | 0.008      | -0.002      |
| going  | 0.010 | 0.001 | 0.010 | 0.001  | 0.007      | -0.002      |
| years  | 0.011 | 0.001 | 0.012 | 0.001  | 0.010      | -0.001      |
| life   | 0.015 | 0.001 | 0.017 | 0.002  | 0.011      | -0.003      |

C

Figure 22: Most skewed associations in FineWeb for *gender* terms ‘non-binary’ (A), ‘woman’ (B), and ‘man’ (C) in FineWeb compared to one another, measured using TF-IDF. Columns are sorted by the ‘non-binary+’, ‘woman+’ and ‘man+’ columns, measuring the difference from the mean over all words occurring more than once in the dataset.

| word      | atheist | atheist+ | muslim | muslim+ | christian | christian+ | jewish | jewish+ | hindu | hindu+ | buddhist | buddhist+ |
|-----------|---------|----------|--------|---------|-----------|------------|--------|---------|-------|--------|----------|-----------|
| atheist   | 0.095   | 0.078    | 0.001  | -0.016  | 0.003     | -0.014     | 0.001  | -0.016  | 0.001 | -0.016 | 0.001    | -0.016    |
| god       | 0.080   | 0.057    | 0.010  | -0.013  | 0.026     | 0.003      | 0.008  | -0.015  | 0.008 | -0.014 | 0.006    | -0.017    |
| religion  | 0.043   | 0.030    | 0.010  | -0.004  | 0.007     | -0.007     | 0.005  | -0.009  | 0.010 | -0.004 | 0.008    | -0.006    |
| religious | 0.039   | 0.028    | 0.007  | -0.004  | 0.006     | -0.006     | 0.005  | -0.006  | 0.006 | -0.005 | 0.006    | -0.006    |
| church    | 0.027   | 0.017    | 0.004  | -0.006  | 0.016     | 0.006      | 0.005  | -0.005  | 0.003 | -0.007 | 0.005    | -0.005    |
| people    | 0.035   | 0.014    | 0.021  | -0.001  | 0.019     | -0.002     | 0.019  | -0.002  | 0.016 | -0.006 | 0.019    | -0.003    |
| think     | 0.021   | 0.012    | 0.008  | -0.001  | 0.008     | -0.001     | 0.007  | -0.002  | 0.004 | -0.005 | 0.007    | -0.002    |
| don       | 0.021   | 0.011    | 0.009  | -0.001  | 0.009     | -0.001     | 0.007  | -0.002  | 0.004 | -0.005 | 0.007    | -0.002    |
| life      | 0.023   | 0.010    | 0.009  | -0.004  | 0.013     | -0.000     | 0.010  | -0.004  | 0.011 | -0.003 | 0.015    | 0.002     |
| like      | 0.024   | 0.009    | 0.014  | -0.001  | 0.015     | -0.001     | 0.014  | -0.002  | 0.011 | -0.004 | 0.014    | -0.002    |
| know      | 0.020   | 0.009    | 0.010  | -0.001  | 0.011     | 0.000      | 0.009  | -0.001  | 0.006 | -0.004 | 0.008    | -0.003    |
| just      | 0.022   | 0.009    | 0.013  | -0.001  | 0.014     | -0.000     | 0.012  | -0.002  | 0.009 | -0.005 | 0.013    | -0.001    |
| world     | 0.020   | 0.008    | 0.012  | -0.000  | 0.010     | -0.002     | 0.011  | -0.001  | 0.010 | -0.003 | 0.010    | -0.002    |
| way       | 0.016   | 0.006    | 0.008  | -0.001  | 0.009     | -0.000     | 0.008  | -0.002  | 0.006 | -0.003 | 0.010    | 0.000     |
| good      | 0.015   | 0.006    | 0.009  | -0.001  | 0.010     | 0.001      | 0.008  | -0.002  | 0.006 | -0.003 | 0.008    | -0.001    |
| time      | 0.017   | 0.005    | 0.011  | -0.001  | 0.011     | -0.000     | 0.010  | -0.001  | 0.008 | -0.003 | 0.011    | -0.000    |
| man       | 0.015   | 0.004    | 0.012  | 0.001   | 0.012     | 0.001      | 0.011  | 0.000   | 0.009 | -0.002 | 0.007    | -0.004    |
| christian | 0.031   | 0.003    | 0.016  | -0.012  | 0.077     | 0.049      | 0.018  | -0.009  | 0.013 | -0.015 | 0.011    | -0.016    |
| catholic  | 0.012   | 0.002    | 0.006  | -0.004  | 0.015     | 0.005      | 0.014  | 0.003   | 0.006 | -0.004 | 0.010    | -0.001    |

Figure 23: Most skewed associations in FineWeb for ‘atheist’ compared to other religions, measured using TF-IDF. Columns are sorted by the ‘atheist+’ column, measuring the difference from the mean over all words.

| word      | buddhist | buddhist+ | atheist | atheist+ | muslim | muslim+ | christian | christian+ | jewish | jewish+ | hindu | hindu+ |
|-----------|----------|-----------|---------|----------|--------|---------|-----------|------------|--------|---------|-------|--------|
| buddhist  | 0.169    | 0.134     | 0.003   | -0.033   | 0.006  | -0.029  | 0.005     | -0.030     | 0.007  | -0.029  | 0.022 | -0.013 |
| single    | 0.055    | 0.018     | 0.003   | -0.034   | 0.034  | -0.003  | 0.033     | -0.004     | 0.045  | 0.007   | 0.054 | 0.017  |
| singles   | 0.085    | 0.015     | 0.002   | -0.068   | 0.065  | -0.005  | 0.076     | 0.006      | 0.110  | 0.041   | 0.079 | 0.010  |
| personals | 0.034    | 0.012     | 0.001   | -0.021   | 0.018  | -0.004  | 0.018     | -0.004     | 0.032  | 0.009   | 0.031 | 0.009  |
| site      | 0.038    | 0.007     | 0.004   | -0.027   | 0.033  | 0.002   | 0.035     | 0.004      | 0.043  | 0.012   | 0.035 | 0.003  |
| men       | 0.036    | 0.007     | 0.009   | -0.021   | 0.030  | 0.001   | 0.028     | -0.002     | 0.034  | 0.004   | 0.040 | 0.011  |
| women     | 0.046    | 0.006     | 0.010   | -0.030   | 0.048  | 0.007   | 0.037     | -0.004     | 0.050  | 0.009   | 0.053 | 0.012  |
| chat      | 0.019    | 0.005     | 0.001   | -0.013   | 0.014  | 0.000   | 0.016     | 0.002      | 0.016  | 0.002   | 0.017 | 0.003  |
| meet      | 0.028    | 0.004     | 0.003   | -0.021   | 0.028  | 0.003   | 0.026     | 0.001      | 0.034  | 0.010   | 0.027 | 0.003  |
| 100       | 0.013    | 0.003     | 0.002   | -0.007   | 0.008  | -0.001  | 0.010     | 0.000      | 0.011  | 0.002   | 0.011 | 0.002  |
| essay     | 0.013    | 0.003     | 0.003   | -0.007   | 0.007  | -0.003  | 0.009     | -0.001     | 0.010  | 0.001   | 0.017 | 0.007  |
| free      | 0.035    | 0.002     | 0.008   | -0.024   | 0.034  | 0.002   | 0.038     | 0.005      | 0.042  | 0.009   | 0.038 | 0.005  |
| date      | 0.011    | 0.002     | 0.002   | -0.008   | 0.010  | 0.000   | 0.012     | 0.002      | 0.012  | 0.002   | 0.012 | 0.002  |
| life      | 0.015    | 0.002     | 0.023   | 0.010    | 0.009  | -0.004  | 0.013     | -0.000     | 0.010  | -0.004  | 0.011 | -0.003 |
| asian     | 0.011    | 0.001     | 0.001   | -0.009   | 0.011  | 0.002   | 0.009     | -0.001     | 0.012  | 0.002   | 0.014 | 0.004  |
| looking   | 0.014    | 0.001     | 0.004   | -0.009   | 0.015  | 0.002   | 0.015     | 0.001      | 0.018  | 0.005   | 0.015 | 0.001  |

Figure 24: Most skewed associations in FineWeb for ‘buddhist’ compared to other religions, measured using TF-IDF. Columns are sorted by the ‘buddhist+’ column, measuring the difference from the mean over all words.

| word      | christian | christian+ | jewish | jewish+ | hindu | hindu+ | buddhist | buddhist+ | atheist | atheist+ | muslim | muslim+ |
|-----------|-----------|------------|--------|---------|-------|--------|----------|-----------|---------|----------|--------|---------|
| dating    | 0.192     | 0.049      | 0.212  | 0.069   | 0.146 | 0.004  | 0.133    | -0.009    | 0.009   | -0.134   | 0.164  | 0.021   |
| christian | 0.077     | 0.049      | 0.018  | -0.009  | 0.013 | -0.015 | 0.011    | -0.016    | 0.031   | 0.003    | 0.016  | -0.012  |
| online    | 0.047     | 0.010      | 0.057  | 0.020   | 0.038 | 0.001  | 0.032    | -0.005    | 0.004   | -0.033   | 0.043  | 0.006   |
| sites     | 0.023     | 0.009      | 0.022  | 0.008   | 0.013 | -0.002 | 0.009    | -0.005    | 0.002   | -0.013   | 0.019  | 0.004   |
| singles   | 0.076     | 0.006      | 0.110  | 0.041   | 0.079 | 0.010  | 0.085    | 0.015     | 0.002   | -0.068   | 0.065  | -0.005  |
| church    | 0.016     | 0.006      | 0.005  | -0.005  | 0.003 | -0.007 | 0.005    | -0.005    | 0.027   | 0.017    | 0.004  | -0.006  |
| free      | 0.038     | 0.005      | 0.042  | 0.009   | 0.038 | 0.005  | 0.035    | 0.002     | 0.008   | -0.024   | 0.034  | 0.002   |
| catholic  | 0.015     | 0.005      | 0.014  | 0.003   | 0.006 | -0.004 | 0.010    | -0.001    | 0.012   | 0.002    | 0.006  | -0.004  |
| site      | 0.035     | 0.004      | 0.043  | 0.012   | 0.035 | 0.003  | 0.038    | 0.007     | 0.004   | -0.027   | 0.033  | 0.002   |
| love      | 0.017     | 0.003      | 0.014  | -0.000  | 0.016 | 0.001  | 0.014    | -0.001    | 0.013   | -0.002   | 0.013  | -0.001  |
| god       | 0.026     | 0.003      | 0.008  | -0.015  | 0.008 | -0.014 | 0.006    | -0.017    | 0.080   | 0.057    | 0.010  | -0.013  |
| chat      | 0.016     | 0.002      | 0.016  | 0.002   | 0.017 | 0.003  | 0.019    | 0.005     | 0.001   | -0.013   | 0.014  | 0.000   |
| best      | 0.015     | 0.002      | 0.016  | 0.003   | 0.014 | 0.001  | 0.013    | -0.000    | 0.006   | -0.006   | 0.014  | 0.001   |
| date      | 0.012     | 0.002      | 0.012  | 0.002   | 0.012 | 0.002  | 0.011    | 0.002     | 0.002   | -0.008   | 0.010  | 0.000   |
| meet      | 0.026     | 0.001      | 0.034  | 0.010   | 0.027 | 0.003  | 0.028    | 0.004     | 0.003   | -0.021   | 0.028  | 0.003   |
| sex       | 0.015     | 0.001      | 0.015  | 0.002   | 0.014 | 0.000  | 0.011    | -0.002    | 0.005   | -0.008   | 0.020  | 0.007   |
| looking   | 0.015     | 0.001      | 0.018  | 0.005   | 0.015 | 0.001  | 0.014    | 0.001     | 0.004   | -0.009   | 0.015  | 0.002   |
| gay       | 0.013     | 0.001      | 0.016  | 0.004   | 0.013 | 0.001  | 0.010    | -0.002    | 0.006   | -0.006   | 0.013  | 0.001   |
| man       | 0.012     | 0.001      | 0.011  | 0.000   | 0.009 | -0.002 | 0.007    | -0.004    | 0.015   | 0.004    | 0.012  | 0.001   |
| good      | 0.010     | 0.001      | 0.008  | -0.002  | 0.006 | -0.003 | 0.008    | -0.001    | 0.015   | 0.006    | 0.009  | -0.001  |
| woman     | 0.010     | 0.001      | 0.011  | 0.002   | 0.010 | 0.001  | 0.008    | -0.001    | 0.006   | -0.003   | 0.011  | 0.002   |
| mature    | 0.010     | 0.001      | 0.020  | 0.010   | 0.007 | -0.003 | 0.006    | -0.003    | 0.001   | -0.009   | 0.014  | 0.004   |

Figure 25: Most skewed associations in FineWeb for ‘christian’ compared to other religions, measured using TF-IDF. Columns are sorted by the ‘christian+’ column, measuring the difference from the mean over all words.

| word    | muslim | muslim+ | christian | christian+ | jewish | jewish+ | hindu | hindu+ | buddhist | buddhist+ | atheist | atheist+ |
|---------|--------|---------|-----------|------------|--------|---------|-------|--------|----------|-----------|---------|----------|
| muslim  | 0.115  | 0.083   | 0.011     | -0.021     | 0.018  | -0.015  | 0.027 | -0.006 | 0.015    | -0.017    | 0.009   | -0.024   |
| dating  | 0.164  | 0.021   | 0.192     | 0.049      | 0.212  | 0.069   | 0.146 | 0.004  | 0.133    | -0.009    | 0.009   | -0.134   |
| women   | 0.048  | 0.007   | 0.037     | -0.004     | 0.050  | 0.009   | 0.053 | 0.012  | 0.046    | 0.006     | 0.010   | -0.030   |
| sex     | 0.020  | 0.007   | 0.015     | 0.001      | 0.015  | 0.002   | 0.014 | 0.000  | 0.011    | -0.002    | 0.005   | -0.008   |
| online  | 0.043  | 0.006   | 0.047     | 0.010      | 0.057  | 0.020   | 0.038 | 0.001  | 0.032    | -0.005    | 0.004   | -0.033   |
| girl    | 0.015  | 0.005   | 0.009     | -0.000     | 0.011  | 0.002   | 0.010 | 0.001  | 0.007    | -0.002    | 0.003   | -0.006   |
| girls   | 0.016  | 0.005   | 0.012     | 0.000      | 0.016  | 0.004   | 0.014 | 0.002  | 0.010    | -0.002    | 0.003   | -0.009   |
| sites   | 0.019  | 0.004   | 0.023     | 0.009      | 0.022  | 0.008   | 0.013 | -0.002 | 0.009    | -0.005    | 0.002   | -0.013   |
| mature  | 0.014  | 0.004   | 0.010     | 0.001      | 0.020  | 0.010   | 0.007 | -0.003 | 0.006    | -0.003    | 0.001   | -0.009   |
| meet    | 0.028  | 0.003   | 0.026     | 0.001      | 0.034  | 0.010   | 0.027 | 0.003  | 0.028    | 0.004     | 0.003   | -0.021   |
| woman   | 0.011  | 0.002   | 0.010     | 0.001      | 0.011  | 0.002   | 0.010 | 0.001  | 0.008    | -0.001    | 0.006   | -0.003   |
| asian   | 0.011  | 0.002   | 0.009     | -0.001     | 0.012  | 0.002   | 0.014 | 0.004  | 0.011    | 0.001     | 0.001   | -0.009   |
| free    | 0.034  | 0.002   | 0.038     | 0.005      | 0.042  | 0.009   | 0.038 | 0.005  | 0.035    | 0.002     | 0.008   | -0.024   |
| site    | 0.033  | 0.002   | 0.035     | 0.004      | 0.043  | 0.012   | 0.035 | 0.003  | 0.038    | 0.007     | 0.004   | -0.027   |
| looking | 0.015  | 0.002   | 0.015     | 0.001      | 0.018  | 0.005   | 0.015 | 0.001  | 0.014    | 0.001     | 0.004   | -0.009   |
| gay     | 0.013  | 0.001   | 0.013     | 0.001      | 0.016  | 0.004   | 0.013 | 0.001  | 0.010    | -0.002    | 0.006   | -0.006   |
| best    | 0.014  | 0.001   | 0.015     | 0.002      | 0.016  | 0.003   | 0.014 | 0.001  | 0.013    | -0.000    | 0.006   | -0.006   |
| men     | 0.030  | 0.001   | 0.028     | -0.002     | 0.034  | 0.004   | 0.040 | 0.011  | 0.036    | 0.007     | 0.009   | -0.021   |
| man     | 0.012  | 0.001   | 0.012     | 0.001      | 0.011  | 0.000   | 0.009 | -0.002 | 0.007    | -0.004    | 0.015   | 0.004    |

Figure 26: Most skewed associations in FineWeb for ‘muslim’ compared to other religions, measured using TF-IDF. Columns are sorted by the ‘muslim+’ column, measuring the difference from the mean over all words.

| word      | jewish | jewish+ | hindu | hindu+ | buddhist | buddhist+ | atheist | atheist+ | muslim | muslim+ | christian | christian+ |
|-----------|--------|---------|-------|--------|----------|-----------|---------|----------|--------|---------|-----------|------------|
| jewish    | 0.128  | 0.097   | 0.018 | -0.014 | 0.013    | -0.019    | 0.007   | -0.024   | 0.012  | -0.020  | 0.012     | -0.020     |
| dating    | 0.212  | 0.069   | 0.146 | 0.004  | 0.133    | -0.009    | 0.009   | -0.134   | 0.164  | 0.021   | 0.192     | 0.049      |
| singles   | 0.110  | 0.041   | 0.079 | 0.010  | 0.085    | 0.015     | 0.002   | -0.068   | 0.065  | -0.005  | 0.076     | 0.006      |
| online    | 0.057  | 0.020   | 0.038 | 0.001  | 0.032    | -0.005    | 0.004   | -0.033   | 0.043  | 0.006   | 0.047     | 0.010      |
| site      | 0.043  | 0.012   | 0.035 | 0.003  | 0.038    | 0.007     | 0.004   | -0.027   | 0.033  | 0.002   | 0.035     | 0.004      |
| mature    | 0.020  | 0.010   | 0.007 | -0.003 | 0.006    | -0.003    | 0.001   | -0.009   | 0.014  | 0.004   | 0.010     | 0.001      |
| meet      | 0.034  | 0.010   | 0.027 | 0.003  | 0.028    | 0.004     | 0.003   | -0.021   | 0.028  | 0.003   | 0.026     | 0.001      |
| personals | 0.032  | 0.009   | 0.031 | 0.009  | 0.034    | 0.012     | 0.001   | -0.021   | 0.018  | -0.004  | 0.018     | -0.004     |
| free      | 0.042  | 0.009   | 0.038 | 0.005  | 0.035    | 0.002     | 0.008   | -0.024   | 0.034  | 0.002   | 0.038     | 0.005      |
| women     | 0.050  | 0.009   | 0.053 | 0.012  | 0.046    | 0.006     | 0.010   | -0.030   | 0.048  | 0.007   | 0.037     | -0.004     |
| sites     | 0.022  | 0.008   | 0.013 | -0.002 | 0.009    | -0.005    | 0.002   | -0.013   | 0.019  | 0.004   | 0.023     | 0.009      |
| single    | 0.045  | 0.007   | 0.054 | 0.017  | 0.055    | 0.018     | 0.003   | -0.034   | 0.034  | -0.003  | 0.033     | -0.004     |
| looking   | 0.018  | 0.005   | 0.015 | 0.001  | 0.014    | 0.001     | 0.004   | -0.009   | 0.015  | 0.002   | 0.015     | 0.001      |
| men       | 0.034  | 0.004   | 0.040 | 0.011  | 0.036    | 0.007     | 0.009   | -0.021   | 0.030  | 0.001   | 0.028     | -0.002     |
| girls     | 0.016  | 0.004   | 0.014 | 0.002  | 0.010    | -0.002    | 0.003   | -0.009   | 0.016  | 0.005   | 0.012     | 0.000      |
| gay       | 0.016  | 0.004   | 0.013 | 0.001  | 0.010    | -0.002    | 0.006   | -0.006   | 0.013  | 0.001   | 0.013     | 0.001      |
| best      | 0.016  | 0.003   | 0.014 | 0.001  | 0.013    | -0.000    | 0.006   | -0.006   | 0.014  | 0.001   | 0.015     | 0.002      |
| catholic  | 0.014  | 0.003   | 0.006 | -0.004 | 0.010    | -0.001    | 0.012   | 0.002    | 0.006  | -0.004  | 0.015     | 0.005      |
| new       | 0.016  | 0.002   | 0.013 | -0.001 | 0.013    | -0.001    | 0.014   | -0.000   | 0.013  | -0.001  | 0.014     | 0.000      |
| date      | 0.012  | 0.002   | 0.012 | 0.002  | 0.011    | 0.002     | 0.002   | -0.008   | 0.010  | 0.000   | 0.012     | 0.002      |
| asian     | 0.012  | 0.002   | 0.014 | 0.004  | 0.011    | 0.001     | 0.001   | -0.009   | 0.011  | 0.002   | 0.009     | -0.001     |
| girl      | 0.011  | 0.002   | 0.010 | 0.001  | 0.007    | -0.002    | 0.003   | -0.006   | 0.015  | 0.005   | 0.009     | -0.000     |
| sex       | 0.015  | 0.002   | 0.014 | 0.000  | 0.011    | -0.002    | 0.005   | -0.008   | 0.020  | 0.007   | 0.015     | 0.001      |
| chat      | 0.016  | 0.002   | 0.017 | 0.003  | 0.019    | 0.005     | 0.001   | -0.013   | 0.014  | 0.000   | 0.016     | 0.002      |
| 100       | 0.011  | 0.002   | 0.011 | 0.002  | 0.013    | 0.003     | 0.002   | -0.007   | 0.008  | -0.001  | 0.010     | 0.000      |
| woman     | 0.011  | 0.002   | 0.010 | 0.001  | 0.008    | -0.001    | 0.006   | -0.003   | 0.011  | 0.002   | 0.010     | 0.001      |
| essay     | 0.010  | 0.001   | 0.017 | 0.007  | 0.013    | 0.003     | 0.003   | -0.007   | 0.007  | -0.003  | 0.009     | -0.001     |

Figure 27: Most skewed associations in FineWeb for ‘jewish’ compared to other religions, measured using TF-IDF. Columns are sorted by the ‘jewish+’ column, measuring the difference from the mean over all words.

| word      | hindu | hindu+ | buddhist | buddhist+ | atheist | atheist+ | muslim | muslim+ | christian | christian+ | jewish | jewish+ |
|-----------|-------|--------|----------|-----------|---------|----------|--------|---------|-----------|------------|--------|---------|
| hindu     | 0.129 | 0.100  | 0.020    | -0.009    | 0.002   | -0.027   | 0.015  | -0.015  | 0.004     | -0.026     | 0.006  | -0.023  |
| indian    | 0.037 | 0.026  | 0.008    | -0.003    | 0.001   | -0.009   | 0.011  | 0.000   | 0.004     | -0.007     | 0.004  | -0.007  |
| single    | 0.054 | 0.017  | 0.055    | 0.018     | 0.003   | -0.034   | 0.034  | -0.003  | 0.033     | -0.004     | 0.045  | 0.007   |
| women     | 0.053 | 0.012  | 0.046    | 0.006     | 0.010   | -0.030   | 0.048  | 0.007   | 0.037     | -0.004     | 0.050  | 0.009   |
| men       | 0.040 | 0.011  | 0.036    | 0.007     | 0.009   | -0.021   | 0.030  | 0.001   | 0.028     | -0.002     | 0.034  | 0.004   |
| singles   | 0.079 | 0.010  | 0.085    | 0.015     | 0.002   | -0.068   | 0.065  | -0.005  | 0.076     | 0.006      | 0.110  | 0.041   |
| personals | 0.031 | 0.009  | 0.034    | 0.012     | 0.001   | -0.021   | 0.018  | -0.004  | 0.018     | -0.004     | 0.032  | 0.009   |
| essay     | 0.017 | 0.007  | 0.013    | 0.003     | 0.003   | -0.007   | 0.007  | -0.003  | 0.009     | -0.001     | 0.010  | 0.001   |
| free      | 0.038 | 0.005  | 0.035    | 0.002     | 0.008   | -0.024   | 0.034  | 0.002   | 0.038     | 0.005      | 0.042  | 0.009   |
| asian     | 0.014 | 0.004  | 0.011    | 0.001     | 0.001   | -0.009   | 0.011  | 0.002   | 0.009     | -0.001     | 0.012  | 0.002   |
| dating    | 0.146 | 0.004  | 0.133    | -0.009    | 0.009   | -0.134   | 0.164  | 0.021   | 0.192     | 0.049      | 0.212  | 0.069   |
| chat      | 0.017 | 0.003  | 0.019    | 0.005     | 0.001   | -0.013   | 0.014  | 0.000   | 0.016     | 0.002      | 0.016  | 0.002   |
| site      | 0.035 | 0.003  | 0.038    | 0.007     | 0.004   | -0.027   | 0.033  | 0.002   | 0.035     | 0.004      | 0.043  | 0.012   |
| meet      | 0.027 | 0.003  | 0.028    | 0.004     | 0.003   | -0.021   | 0.028  | 0.003   | 0.026     | 0.001      | 0.034  | 0.010   |
| date      | 0.012 | 0.002  | 0.011    | 0.002     | 0.002   | -0.008   | 0.010  | 0.000   | 0.012     | 0.002      | 0.012  | 0.002   |
| 100       | 0.011 | 0.002  | 0.013    | 0.003     | 0.002   | -0.007   | 0.008  | -0.001  | 0.010     | 0.000      | 0.011  | 0.002   |
| girls     | 0.014 | 0.002  | 0.010    | -0.002    | 0.003   | -0.009   | 0.016  | 0.005   | 0.012     | 0.000      | 0.016  | 0.004   |
| gay       | 0.013 | 0.001  | 0.010    | -0.002    | 0.006   | -0.006   | 0.013  | 0.001   | 0.013     | 0.001      | 0.016  | 0.004   |
| love      | 0.016 | 0.001  | 0.014    | -0.001    | 0.013   | -0.002   | 0.013  | -0.001  | 0.017     | 0.003      | 0.014  | -0.000  |
| looking   | 0.015 | 0.001  | 0.014    | 0.001     | 0.004   | -0.009   | 0.015  | 0.002   | 0.015     | 0.001      | 0.018  | 0.005   |
| girl      | 0.010 | 0.001  | 0.007    | -0.002    | 0.003   | -0.006   | 0.015  | 0.005   | 0.009     | -0.000     | 0.011  | 0.002   |
| online    | 0.038 | 0.001  | 0.032    | -0.005    | 0.004   | -0.033   | 0.043  | 0.006   | 0.047     | 0.010      | 0.057  | 0.020   |
| best      | 0.014 | 0.001  | 0.013    | -0.000    | 0.006   | -0.006   | 0.014  | 0.001   | 0.015     | 0.002      | 0.016  | 0.003   |
| woman     | 0.010 | 0.001  | 0.008    | -0.001    | 0.006   | -0.003   | 0.011  | 0.002   | 0.010     | 0.001      | 0.011  | 0.002   |

Figure 28: Most skewed associations in FineWeb for ‘hindu’ compared to other religions, measured using TF-IDF. Columns are sorted by the ‘hindu+’ column, measuring the difference from the mean over all words.

| word   | old   | old+  | young | young+ |
|--------|-------|-------|-------|--------|
| old    | 0.034 | 0.012 | 0.010 | -0.012 |
| just   | 0.019 | 0.002 | 0.016 | -0.002 |
| new    | 0.018 | 0.002 | 0.015 | -0.002 |
| like   | 0.021 | 0.002 | 0.017 | -0.002 |
| ve     | 0.011 | 0.001 | 0.009 | -0.001 |
| don    | 0.013 | 0.001 | 0.010 | -0.001 |
| ll     | 0.009 | 0.001 | 0.006 | -0.001 |
| use    | 0.009 | 0.001 | 0.006 | -0.001 |
| time   | 0.019 | 0.001 | 0.017 | -0.001 |
| really | 0.012 | 0.001 | 0.009 | -0.001 |
| good   | 0.013 | 0.001 | 0.011 | -0.001 |
| little | 0.010 | 0.001 | 0.008 | -0.001 |
| got    | 0.009 | 0.001 | 0.007 | -0.001 |
| things | 0.010 | 0.001 | 0.008 | -0.001 |
| know   | 0.013 | 0.001 | 0.011 | -0.001 |
| make   | 0.012 | 0.001 | 0.011 | -0.001 |
| want   | 0.010 | 0.001 | 0.009 | -0.001 |
| look   | 0.008 | 0.001 | 0.007 | -0.001 |
| need   | 0.009 | 0.001 | 0.008 | -0.001 |
| home   | 0.010 | 0.001 | 0.009 | -0.001 |
| right  | 0.009 | 0.001 | 0.008 | -0.001 |
| going  | 0.010 | 0.001 | 0.009 | -0.001 |
| day    | 0.012 | 0.001 | 0.011 | -0.001 |
| way    | 0.012 | 0.001 | 0.011 | -0.001 |
| great  | 0.010 | 0.001 | 0.009 | -0.001 |
| think  | 0.011 | 0.001 | 0.010 | -0.001 |

**A**

| word     | young | young+ | old   | old+   |
|----------|-------|--------|-------|--------|
| young    | 0.038 | 0.016  | 0.006 | -0.016 |
| children | 0.016 | 0.005  | 0.007 | -0.005 |
| women    | 0.011 | 0.003  | 0.006 | -0.003 |
| school   | 0.013 | 0.003  | 0.008 | -0.003 |
| said     | 0.017 | 0.002  | 0.012 | -0.002 |
| people   | 0.021 | 0.002  | 0.016 | -0.002 |
| child    | 0.009 | 0.002  | 0.005 | -0.002 |
| life     | 0.015 | 0.001  | 0.012 | -0.001 |
| family   | 0.011 | 0.001  | 0.008 | -0.001 |
| story    | 0.009 | 0.001  | 0.007 | -0.001 |
| world    | 0.012 | 0.001  | 0.010 | -0.001 |
| man      | 0.010 | 0.001  | 0.008 | -0.001 |
| book     | 0.010 | 0.001  | 0.008 | -0.001 |

**B**

Figure 29: Age bias in FineWeb, measured as most skewed associations for ‘old’ and ‘young’, using TF-IDF. Sorted by the difference from the mean TF-IDF for all words associated to ‘old’ (‘old+’, A) and ‘young’ (‘young+’, B).
